# Supplementary material for: Brazilian recommendations of mechanical ventilation 2013. Part I
Source: PubMed Central journal article supplement — Rev Bras Ter Intensiva. 2014 Apr-Jun;26(2):89–121. doi: 10.5935/0103-507X.20140017 (PMC4103936; doi:10.5935/0103-507x.20140017), 2014
Supplement: rbti-26-02-0089-s01.pdf [file rbti-26-02-0089-s01.pdf]

## Brazilian recommendations of mechanical ventilation – 2013

### *Recomendações brasileiras de ventilação mecânica 2013. Parte I*

Carmen Sílvia Valente Barbas, Alexandre Marini Ísola, Augusto Manoel de Carvalho Farias, Alexandre Biasi Cavalcanti, Ana Maria Casati Gama, Antonio Carlos Magalhães Duarte, Arthur Vianna, Ary Serpa Neto, Bruno de Arruda Bravim, Bruno do Valle Pinheiro, Bruno Franco Mazza, Carlos Roberto Ribeiro de Carvalho, Carlos Toufen Júnior, Cid Marcos Nascimento David, Corine Taniguchi, Débora Dutra da Silveira Mazza, Desanka Dragosavac, Diogo Oliveira Toledo, Eduardo Leite Costa, Eliana Bernardete Caser, Eliezer Silva, Fabio Ferreira Amorim, Felipe Saddy, Filomena Regina Barbosa Gomes Galas, Gisele Sampaio Silva, Gustavo Faissol Janot de Matos, João Claudio Emmerich, Jorge Luis dos Santos Valiatti, José Mario Meira Teles, Josué Almeida Victorino, Juliana Carvalho Ferreira, Luciana Passuello do Vale Prodomo, Ludhmila Abrahão Hajjar, Luiz Cláudio Martins, Luiz Marcelo Sá Malbouisson, Mara Ambrosina de Oliveira Vargas, Marco Antonio Soares Reis, Marcelo Brito Passos Amato, Marcelo Alcântara Holanda, Marcelo Park, Marcia Jacomelli, Marcos Tavares, Marta Cristina Paulette Damasceno, Murillo Santucci César Assunção, Moyzes Pinto Coelho Duarte Damasceno, Nazah Cherif Mohamad Youssef, Paulo José Zimmermann Teixeira, Pedro Caruso, Péricles Almeida Delfino Duarte, Octavio Messeder, Raquel Caserta Eid, Ricardo Goulart Rodrigues, Rodrigo Francisco de Jesus, Ronaldo Adib Kairalla, Sandra Justino, Sérgio Nogueira Nemer, Simone Barbosa Romero, Verônica Moreira Amado

**Table 1 - Available ventilators for noninvasive ventilation**

| Manufacturer/Model         | Context of use         | Available modes                                                                                    | Special modes                                                                              | Observations                                                   |
|----------------------------|------------------------|----------------------------------------------------------------------------------------------------|--------------------------------------------------------------------------------------------|----------------------------------------------------------------|
| <b>Philips</b>             |                        |                                                                                                    |                                                                                            |                                                                |
| BIPAP A30                  | Specific for NIV       | AVAPS<br>Auto-trak                                                                                 | Oximetry coupling                                                                          | Memory card and trends can be coupled                          |
| TRILOGY-100                | NIV and IMV            | PSV,PCV and VCV<br>AVAPS                                                                           | Leak compensation<br>Auto-trak<br>Heated humidification                                    | Monitoring screen<br>6-8 hour battery                          |
| <b>Dixtal</b>              |                        |                                                                                                    |                                                                                            |                                                                |
| DX3012                     | NIV and IMV            | PSV, PCV, VCV,SIMV, CPAP                                                                           | Leak compensation<br>Active and passive humidification                                     | Monitoring screen, volumetric capnography                      |
| <b>Philips respironics</b> |                        |                                                                                                    |                                                                                            |                                                                |
| BIPAP-vision, focus and ST | Specific for NIV       | BIPAP and CPAP                                                                                     | Auto-trak<br>Leak compensation<br>Slope adjustment<br>FIO <sub>2</sub> control in vision   | Monitoring screen                                              |
| <b>Resmed</b>              |                        |                                                                                                    |                                                                                            |                                                                |
| Stellar                    | NIV and IMV            | PSV with automatic pressure adjustment<br>iVAPS                                                    | FIO <sub>2</sub> control<br>Portable<br>Data download                                      | Monitoring screen, preset values for diseases, mask adjustment |
| <b>Covidien</b>            |                        |                                                                                                    |                                                                                            |                                                                |
| Covidien 840               | NIV module             | Spontaneous + PSV<br>A/C and SIMV                                                                  | Slope and expiratory sensitivity can be adjusted in PSV                                    | Possible back up with manual ventilation and/or Vf             |
| <b>Servo</b>               |                        |                                                                                                    |                                                                                            |                                                                |
| Servo I                    | NIV module             | Spontaneous and PSV                                                                                | FIO <sub>2</sub> control<br>Adjustment of slope and expiratory cycling                     | Monitoring screen                                              |
| <b>Drager</b>              |                        |                                                                                                    |                                                                                            |                                                                |
| Ventilator Carina          | Specific for NIV       | VC-SIMV Auto-Flow<br>PC-BIPAP<br>PC-AC<br>SPN-PS (VG)<br>SPN-CPAP<br>SPN-CPAP<br>Apnea ventilation | 1-hour internal battery, 9-hour external battery<br>Automatic triggering and slope control | Monitoring screen and automatic leak compensation              |
| EVITA XL                   | Special module for NIV | PSV                                                                                                | Automatic adjustments                                                                      | Monitoring screen                                              |
| <b>GE</b>                  |                        |                                                                                                    |                                                                                            |                                                                |
| Engstrom Pro               | VNI and VMI            | Multiple modes of ventilation                                                                      | Internal battery                                                                           | Monitoring screen and automatic adjustments                    |
| <b>Alliance</b>            |                        |                                                                                                    |                                                                                            |                                                                |
| Care fusion-VELA           | Special module for NIV | PSV                                                                                                | 6-hour battery<br>Leak compensation                                                        | Monitoring screen                                              |

Continue...

...continuation

| Intermed                                                                                          |                        |                      |                                                                    |                                                    |                       |
|---------------------------------------------------------------------------------------------------|------------------------|----------------------|--------------------------------------------------------------------|----------------------------------------------------|-----------------------|
| Care Fusion: IX-5                                                                                 | Special module for NIV | A/C, SIMV, CPAP, PSV | Adjustment of inspiratory and expiratory sensitivity and rise time | Monitoring screen with up to 5 simultaneous curves |                       |
| Care Fusion: Inter 7 plus                                                                         | Special module for NIV | A/C, SIMV, CPAP, PSV | Adjustment of inspiratory and expiratory sensitivity and rise time | 3-hour internal battery                            |                       |
| VIVO                                                                                              |                        |                      |                                                                    |                                                    |                       |
| VIVO 40 (pressure up to 40 cmH <sub>2</sub> O) and VIVO 30 (pressure up to 30 cmH <sub>2</sub> O) | Special module for NIV | PSV, PCV and CPAP    | Adjustment of inspiratory and expiratory sensitivity and rise time | External battery                                   | Humidification system |
| Breas                                                                                             |                        |                      |                                                                    |                                                    |                       |
| I-sleep 20 (pressure up to 20 cmH <sub>2</sub> O)                                                 | Special module for NIV | CPAP                 | Adjustable slope<br>Leak compensation                              | Heated humidifier                                  |                       |

BIPAP - bilevel positive air pressure; NIV - noninvasive ventilation; AVAPS - average volume assured pressure support; IMV - invasive mechanical ventilation; PSV - pressure support ventilation mode; VCV - volume controlled ventilation mode; PCV - pressure controlled ventilation mode; SIMV - synchronized inspiratory mandatory ventilation; CPAP - continuous positive air pressure; iVAPS - intelligent volume-assured pressure support; FIO<sub>2</sub> - fraction of inspired oxygen; Vf - respiratory rate; SPN-PS (VG) - spontaneous - pressure support (volume guarantee); SPN - spontaneous - pressure support; A/C - assist/control.

**Table 2 - Basic ventilators (without curve monitoring)**

| Manufacturer/Model                                | Age range | Context of use | Available modes                              | Flow (VCV)                 | Special modes                      | Observations                                            |
|---------------------------------------------------|-----------|----------------|----------------------------------------------|----------------------------|------------------------------------|---------------------------------------------------------|
| Air Liquide                                       |           |                |                                              |                            |                                    |                                                         |
| Taema Osiris                                      | Ad, Ped   | Transport      | A-C (VCV)                                    | Continuous                 | ---                                | ---                                                     |
| Bio-Vent                                          |           |                |                                              |                            |                                    |                                                         |
| CrossVent CV-3 / CV-4                             | Ad, Ped   | ICU, Transport | A-C (VCV), SIMV, CPAP/spontaneous, PSV       | Continuous                 | ---                                | ---                                                     |
| Care Fusion                                       |           |                |                                              |                            |                                    |                                                         |
| Omni-Tech Omni-Vent                               | Ad, Ped   | Transport      | A-C (VCV)                                    |                            | ---                                | Can be used in MRI<br>Allows for hyperbaric ventilation |
| Allied EPV 200                                    | Ad        | Transport      | A-C (VCV)                                    | Continuous                 | ---                                | ---                                                     |
| Allied Life Support<br>Autovent 2000, 3000 & 4000 | Ad        | Transport      | A-C (VCV), CPAP/ spontaneous                 | Continuous                 | ---                                | ---                                                     |
| Drager                                            |           |                |                                              |                            |                                    |                                                         |
| Oxylog 2000 Plus                                  | Ad        | Transport      | A-C (VCV), SIMV, CPAP/spontaneous            | Continuous                 | ---                                | ---                                                     |
| Oxylog 3000                                       | Ad, Ped   | Transport      | A-C (VCV), PCV, SIMV, CPAP/spontaneous, PSV  | Continuous                 | ---                                | ---                                                     |
| Oxylog 3000                                       | Ad, Ped   | Transport      | A-C (VCV), PCV, SIMV, CPAP/spontaneous, PSV  | Continuous                 | ---                                | Capnometry<br>Optional: auto-flow                       |
| GE                                                |           |                |                                              |                            |                                    |                                                         |
| Bi-Level 40                                       | Ad, Ped   | Transport      | A-C (VCV), PCV, SIMV, CPAP/ spontaneous, PSV | Continuous                 | ---                                | ---                                                     |
| K. Takaoka                                        |           |                |                                              |                            |                                    |                                                         |
| Mini-ventil 600                                   | Ad        | Transport      | A-C (VCV)                                    | Continuous                 | ---                                | ---                                                     |
| MicroTak 920                                      | Ad, Ped   | Transport      | A-C (VCV), SIMV, CPAP/spontaneous            | Continuous                 | ---                                | ---                                                     |
| Leistung                                          |           |                |                                              |                            |                                    |                                                         |
| PR 4D-02                                          | Ad, Ped   | Transport      | A-C (VCV)                                    | Continuous                 | ---                                | Time-cycled                                             |
| Res Med                                           |           |                |                                              |                            |                                    |                                                         |
| VS III                                            | Ad, Ped   | ICU, NIV       | A-C (VCV), PCV, SIMV, CPAP/spontaneous, PSV  | Continuous                 | ---                                | ---                                                     |
| Tyco/Covidien                                     |           |                |                                              |                            |                                    |                                                         |
| Newport HT 70                                     | Ad, Ped   | Transport      | A-C (VCV), PCV, SIMV, CPAP/spontaneous, PSV  | Continuous<br>Decelerating | rise time % expiratory<br>time-PSV | ---                                                     |
| Vent-Logos                                        |           |                |                                              |                            |                                    |                                                         |
| VLP 2000 - E                                      | Ad        | Transport      | A-C (VCV)                                    | Continuous                 | ---                                | ---                                                     |
| VLP 4000 - P                                      | Ad        | Transport      | A-C (VCV)                                    | Continuous                 | ---                                | ---                                                     |

Ad - use in adults; Ped - use in children (non-newborn); A-C - assist control; VCV - volume controlled ventilation mode; SIMV - synchronized inspiratory mandatory ventilation; CPAP - continuous positive air pressure; PCV - pressure controlled ventilation mode; PSV - pressure support ventilation mode; MRI - magnetic resonance imaging; transport - use for transportation of patients under invasive mechanical ventilation; ICU - appropriate for use in intensive care unit; NIV - use for noninvasive ventilation.

**Table 3 - Ventilators with basic resources and with curves**

| Manufacturer/Model    | Age range | Context of use | Available modes                             | Flow (VCV)               | Monitoring    | Special modes                                                    | Observation                                                                                |
|-----------------------|-----------|----------------|---------------------------------------------|--------------------------|---------------|------------------------------------------------------------------|--------------------------------------------------------------------------------------------|
| <b>Air Liquide</b>    |           |                |                                             |                          |               |                                                                  |                                                                                            |
| Extend XT             | Ad, Neo   | ICU            | A-C (VCV), PCV, SIMV, CPAP/spontaneous, PSV | Continuous, decelerating | Curves, loops | ---                                                              | Capnography                                                                                |
| <b>Care Fusion</b>    |           |                |                                             |                          |               |                                                                  |                                                                                            |
| Intermed Inter-5 Plus | Ad, Ped   | ICU            | A-C (VCV), PCV, SIMV, CPAP/spontaneous, PSV | Continuous, decelerating | Curves        | ---                                                              | Separate monitor                                                                           |
| <b>Drager</b>         |           |                |                                             |                          |               |                                                                  |                                                                                            |
| Savina 300            | Ad, Ped   | ICU            | A-C (VCV), PCV, SIMV, CPAP/spontaneous, PSV | Continuous, decelerating | Curves        | BiLevel                                                          | Auto-Flow                                                                                  |
| <b>GE</b>             |           |                |                                             |                          |               |                                                                  |                                                                                            |
| Ventil Pulmonar 101   | Ad, Ped   | ICU, home      | A-C (VCV), PCV, SIMV, CPAP/spontaneous, PSV | Continuous, decelerating | Curves        | PRVC, volume guaranteed                                          | iVent MRI: can be used in MRI                                                              |
| <b>Hamilton</b>       |           |                |                                             |                          |               |                                                                  |                                                                                            |
| Galileo Gold          | Ad, Ped   | ICU            | A-C (VCV), PCV, SIMV, CPAP/spontaneous, PSV | Continuous, decelerating | Curves, loops | ASV, APRV, automatic tube compensation                           | Automatic P-V curve, P0.1                                                                  |
| Raphael Color         | Ad, Ped   | ICU, ER        | A-C (VCV), PCV, SIMV, CPAP/spontaneous, PSV | Continuous, decelerating | Curves, loops | ASV, APRV, automatic tube compensation                           | ---                                                                                        |
| T-1                   | Ad, Ped   | Transport      | A-C (VCV), PCV, SIMV, CPAP/spontaneous, PSV | Continuous, decelerating | Curves        | ASV                                                              | Automatic P-V curve<br>Capnometry<br>Barometric pressure compensation (air transportation) |
| MR-1                  | Ad, Ped   | Transport      | A-C (VCV), PCV, SIMV, CPAP/spontaneous, PSV | Continuous, decelerating | Curves        | ASV                                                              | For MRI<br>"Extra" monitor                                                                 |
| <b>K-Takaoka</b>      |           |                |                                             |                          |               |                                                                  |                                                                                            |
| Smart                 | Ad, Neo   | ICU, ER        | A-C (VCV), PCV, SIMV, CPAP/spontaneous, PSV | Continuous, decelerating | Curves, loops | BiLevel, orotracheal tube compensation                           | P0.1<br>PiMax                                                                              |
| Carmel                | Ad, Neo   | ICU            | A-C (VCV), PCV, SIMV, CPAP/spontaneous, PSV | Continuous, decelerating | Curves        | PSV: rise time & time adjustment (% flow), PCV volume guaranteed | Capnometry                                                                                 |
| <b>Leistung</b>       |           |                |                                             |                          |               |                                                                  |                                                                                            |
| Luft 1-g              | Ad, Ped   | ICU, ER        | A-C (VCV), PCV, SIMV, CPAP/spontaneous, PSV | Continuous, decelerating | Curves        | ---                                                              | ---                                                                                        |
| Luft 2-g              | Ad, Ped   | ICU            | A-C (VCV), PCV, SIMV, CPAP/spontaneous, PSV | Continuous, decelerating | Curves, loops | MMV, BiLevel, PSV volume guaranteed, APRV                        | ---                                                                                        |
| PR - 4g               | Ad, Ped   | Transport      | A-C (VCV), PCV, SIMV, CPAP/spontaneous, PSV | Continuous, decelerating | Curves        | ---                                                              | ---                                                                                        |
| <b>Magnamed</b>       |           |                |                                             |                          |               |                                                                  |                                                                                            |
| Fleximag              | Ad, Neo   | ICU, ER        | A-C (VCV), PCV, SIMV, CPAP/spontaneous, PSV | Continuous, decelerating | Curves        | BiLevel, PSV: rise time                                          | Capnography (optional)                                                                     |
| Oxymag                | Ad, Neo   | Transport      | A-C (VCV), PCV, SIMV, CPAP/spontaneous, PSV | Continuous, decelerating | Curves        | BiLevel, APRV                                                    | Capnography (optional)                                                                     |
| <b>Neumovent</b>      |           |                |                                             |                          |               |                                                                  |                                                                                            |
| GraphNet T5           | Ad, Ped   | ICU, ER        | A-C (VCV), PCV, SIMV, CPAP/spontaneous, PSV | Continuous, decelerating | Curves        | ---                                                              | ---                                                                                        |
| <b>Tyco/Covidien</b>  |           |                |                                             |                          |               |                                                                  |                                                                                            |
| Newport e360          | Ad        | ICU, ER        | A-C (VCV), PCV, SIMV, CPAP/spontaneous, PSV | Continuous, decelerating | Curves, loops | BiLevel, PSV: rise time & time adjustment (% flow), APRV         | ---                                                                                        |

Ad - use in adults; Ped - use in children (non-newborn); Neo - use in neonatology; ICU - appropriate for use in ICU; PSV - pressure support ventilation mode; VCV - volume controlled ventilation mode; PCV - pressure controlled ventilation mode; SIMV - synchronized inspiratory mandatory ventilation; CPAP - continuous positive air pressure; APRV - airway pressure release ventilation; PRVC - pressure regulated volume controlled; ASV - adaptative support ventilation; MMV - minute mandatory ventilation; ER - use in emergency room.

**Table 4 - Ventilators with curve monitoring and advanced resources**

| Manufacturer/Model    | Age range | Context of use | Basic modes | Flow (VCV)               | Monitoring    | Special modes                                                                                                             | Observations                                                 |
|-----------------------|-----------|----------------|-------------|--------------------------|---------------|---------------------------------------------------------------------------------------------------------------------------|--------------------------------------------------------------|
| <b>Air Liquide</b>    |           |                |             |                          |               |                                                                                                                           |                                                              |
| Monnal T-75           | Ad, Neo   | ICU            | Yes         | Continuous, decelerating | Curves, loops | BiLevel CPAP, PRVC                                                                                                        | Capnography                                                  |
| <b>Care Fusion</b>    |           |                |             |                          |               |                                                                                                                           |                                                              |
| Viasys Vela           | Ad, Ped   | ICU            | Yes         | Continuous, decelerating | Curves, loops | PSV: rise time & time adjustment (% flow), PRVC, APRV                                                                     | Capnography                                                  |
| Viasys Avea           | Ad, Neo   | ICU            | Yes         | Continuous, decelerating | Curves, loops | V-PSV, PSV: rise time & time adjustment (% flow), Vsync, PRVC, AAC (tube compensation)                                    | Capnography<br>Measures P0.1, Pimax, WOB (esophageal)        |
| Intermed i X5         | Ad, Neo   | ICU            | Yes         | Continuous, decelerating | Curves, loops | PSV: rise time & time adjustment (% flow), TGI, tube compensation                                                         | Measures P0.1                                                |
| Intermed Inter-7 Plus | Ad, Neo   | ICU            | Yes         | Continuous, decelerating | Curves, loops | PSV: rise time & time adjustment (% flow), VAPS, BiLevel, TGI, APRV (BiPEEP)                                              | Measures P0.1                                                |
| <b>Drager</b>         |           |                |             |                          |               |                                                                                                                           |                                                              |
| Evita 4               | Ad, Ped   | ICU            | Yes         | Continuous, decelerating | Curves, loops | MMV, Auto-Flow, APRV, PPS (optional), ATC - tube compensation                                                             | Capnography, PiMax, Vd/Vt                                    |
| Evita XL              | Ad, Neo   | ICU            | Yes         | Continuous, decelerating | Curves, loops | Auto-Flow, automatic tube compensation, Smart Care Variable SP, BiLevel, PC-APRV, Recruitment maneuver, Low flow maneuver | Capnography, oximetry, Lung protection package (optional)    |
| <b>GE</b>             |           |                |             |                          |               |                                                                                                                           |                                                              |
| Engstrom Carestation  | Ad, Neo   | ICU            | Yes         | Continuous, decelerating | Curves, loops | BiLevel<br>PSV: rise time & time adjustment (% flow), Automatic tube compensation, APRV, PC-volume guaranteed             | P0.1, PiMax, Measures FRC, indirect calorimetry              |
| Engstrom Pro          | Ad, Neo   | ICU            | Yes         | Continuous, decelerating | Curves, loops | BiLevel, PSV: rise time & time adjustment (% flow), automatic orotracheal tube compensation, APRV, PC-volume guaranteed   | P0.1                                                         |
| <b>Hamilton</b>       |           |                |             |                          |               |                                                                                                                           |                                                              |
| C-3                   | Ad, Ped   | ICU, ER        | Yes         | Continuous, decelerating | Curves        | ASV, APRV                                                                                                                 | Volumetric capnometry (optional),                            |
| C-2                   | Ad, Ped   | ICU, ER        | Yes         | Continuous, decelerating | Curves, loops | ASV, APV, Tube compensation, APRV                                                                                         | Automatic P-V curve, Volumetric capnometry (optional),       |
| S-1                   | Ad, Ped   | ICU            | Yes         | Continuous, decelerating | Curves, loops | ASV, APRV                                                                                                                 | Automatic P-V curve, capnography,                            |
| G-5                   | Ad, Neo   | ICU            | Yes         | Continuous, decelerating | Curves, loops | ASV, BiLevel, APRV, APV                                                                                                   | Allows heliox (optional), Volumetric capnography (optional), |
| <b>K Takaoka</b>      |           |                |             |                          |               |                                                                                                                           |                                                              |
| Color                 | Ad, Neo   | ICU            | Yes         | Continuous, decelerating | Curves        | MMV, PSV-volume guaranteed, BiLevel, tube compensation                                                                    | P0.1, PiMax, Capnometry                                      |
| <b>Maquet Getinge</b> |           |                |             |                          |               |                                                                                                                           |                                                              |
| Servo-i               | Ad, Ped   | ICU            | Yes         | Continuous, decelerating | Curves, loops | NAVA (optional), AutoMode, BiLevel, PSV: rise time & time adjustment (% flow), PRVC, APRV                                 | Capnography, P0.1, WOB (in-line)                             |
| Servo-S               | Ad, Ped   | ICU            | Yes         | Continuous, decelerating | Curves, loops | BiLevel, PSV: rise time & time adjustment (% flow), PRVC, APRV                                                            | P0.1                                                         |

Continue...

...continuation

| <b>Mindray</b>       |         |                   |     |                          |               |                                                                                                                        |                                                                                                                                                                               |  |
|----------------------|---------|-------------------|-----|--------------------------|---------------|------------------------------------------------------------------------------------------------------------------------|-------------------------------------------------------------------------------------------------------------------------------------------------------------------------------|--|
| Synovent E3          | Ad, Ped | Hospital, ICU, ER | Yes | Continuous, decelerating | Curves, loops | Bilevel, PSV, optional automatic expiratory trigger control, rise time, time adjustment, tube compensation             | Capnography, PO.1, WOB, PiMax, enables connectivity with the hospital system (Bnelink/HL7)                                                                                    |  |
| Synovent E5          | Ad, Ped | ICU               | Yes | Continuous, decelerating | Curves, loops | PRVC, APRV, Bilevel, PSV, optional automatic expiratory trigger control, rise time, time adjustment, tube compensation | Capnography, PO.1, WOB, PiMax, low flow maneuver, enables connectivity with the hospital system (Bnelink/HL7), displays 4 simultaneous curves (P/T, V/T, F/T and capnography) |  |
| <b>Neumovent</b>     |         |                   |     |                          |               |                                                                                                                        |                                                                                                                                                                               |  |
| GraphNet Advance     | Ad, Neo | ICU               | Yes | Continuous, decelerating | Curves, loops | PRVC, APRV                                                                                                             | Capnography                                                                                                                                                                   |  |
| <b>Philips</b>       |         |                   |     |                          |               |                                                                                                                        |                                                                                                                                                                               |  |
| Dixtal DX-3012 Plus  | Ad, Ped | ICU               | Yes | Continuous, decelerating | Curves, loops | BiLevel, PS-volume guaranteed, MMV, PSV: rise time & time adjustment (% flow), APRV                                    | PO.1, Capnography                                                                                                                                                             |  |
| Dixtal DX-3012       | Ad, Ped | ICU               | Yes | Continuous, decelerating | Curves, loops | BiLevel, PS-Vol Gar, MMV, PSV: rise time & time adjustment (% flow), APRV                                              | Capnography, PO.1, PiMax                                                                                                                                                      |  |
| <b>Tyco/Covidien</b> |         |                   |     |                          |               |                                                                                                                        |                                                                                                                                                                               |  |
| Puritan Bennett 840  | Ad, Ped | ICU               | Yes | Continuous, decelerating | Curves, loops | BiLevel, PSV: rise time & time adjustment (% flow), PAV-Plus, automatic tube compensation, APRV                        |                                                                                                                                                                               |  |

Ad - use in adults; Ped - use in children (non-newborn); Neo - use in neonatology; ICU - appropriate for use in ICU; PSV - pressure support ventilation mode; Bipap - bilevel positive air pressure; VCV - volume controlled ventilation mode; PCV - pressure controlled ventilation mode; SIMV - synchronized inspiratory mandatory ventilation; CPAP - continuous positive air pressure; iVAPS - intelligent volume-assured pressure support; APRV - airway pressure release ventilation; PRVC - pressure regulated volume controlled; ASV - adaptive support ventilation; MMV - minute mandatory ventilation; ER - use in emergency room; VAPS - volume assured pressure support ventilation mode; Pimax - maximal inspiratory pressure; FRC - functional residual capacity; NAVA - neurally adjust ventilatory assist; PAV - proportional assist ventilation; APV - adaptive pressure ventilation; PS - pressure support.

**Table 5 - Mode-dedicated ventilators HFOV (adults)**

| <b>Manufacturer/Model</b> | <b>Age range</b> |
|---------------------------|------------------|
| <b>Care Fusion</b>        |                  |
| SensorMedics 3100 B       | Ad, Ped          |

HFOV - high frequency oscillatory ventilation; Ad - use in adults; Ped - use in children (non-newborn).
